# Supplementary material for: Rapid and facile synthesis of hierarchically mesoporous TiO2–B with enhanced reversible capacity and rate capability
Source: Royal Society of Chemistry journal article supplement (doi:10.1039/c7ta09264d), 2017-12-15
Supplement: c7ta09264d1.pdf [file c7ta09264d1.pdf]

## Supporting Information

### Rapid and facile synthesis of hierarchically mesoporous TiO<sub>2</sub>-B with enhanced reversible capacity and rate capability

Yubin Liu,<sup>a, b</sup> Minghuang Guo,<sup>a, b</sup> Zhenwei Liu,<sup>a, b</sup> Qiaohua Wei<sup>b</sup> and Mingdeng Wei<sup>\*a, b</sup>

<sup>a</sup> State Key Laboratory of Photocatalysis on Energy and Environment, Fuzhou University, Fuzhou, Fujian 350116, China

<sup>b</sup> Institute of Advanced Energy Materials, Fuzhou University, Fuzhou, Fujian 350116, China

\* Corresponding author. E-mail: [wei-mingdeng@fzu.edu.cn](mailto:wei-mingdeng@fzu.edu.cn)

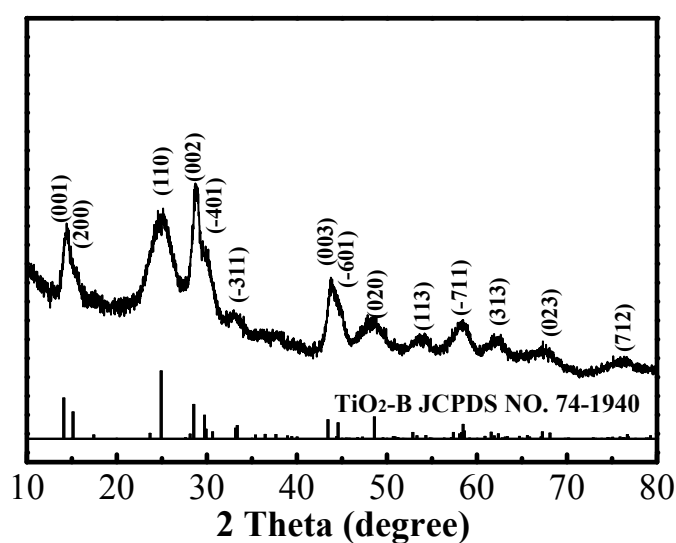

Fig. S1 XRD patterns of TiO<sub>2</sub>-B/amorphous carbon.

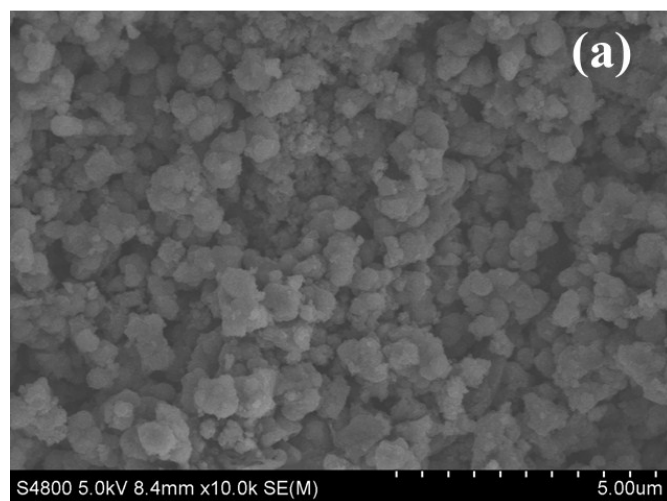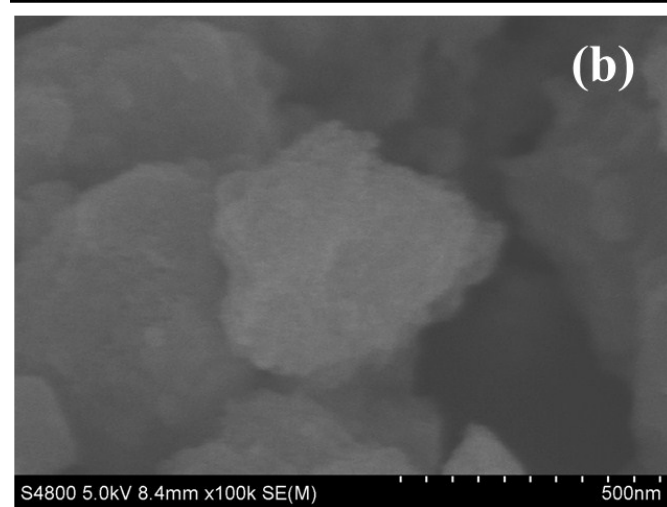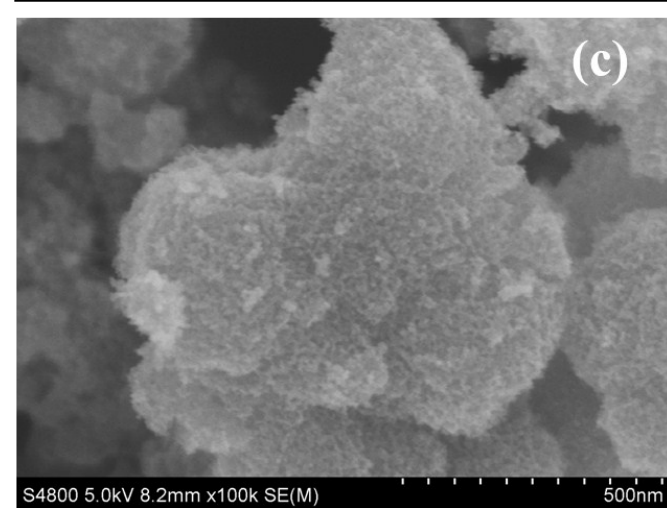

Fig. S2 (a-b) SEM images of  $\text{TiO}_2\text{-B}$ /amorphous carbon and (c) SEM image of HMTOB.

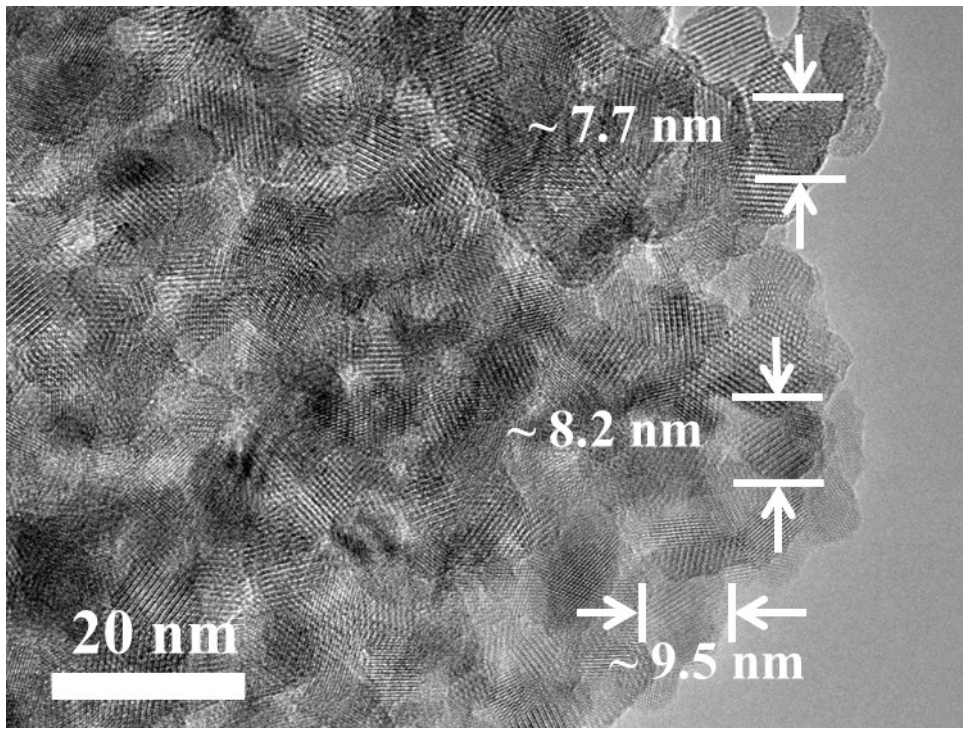

Fig. S3 TEM images of TOB.

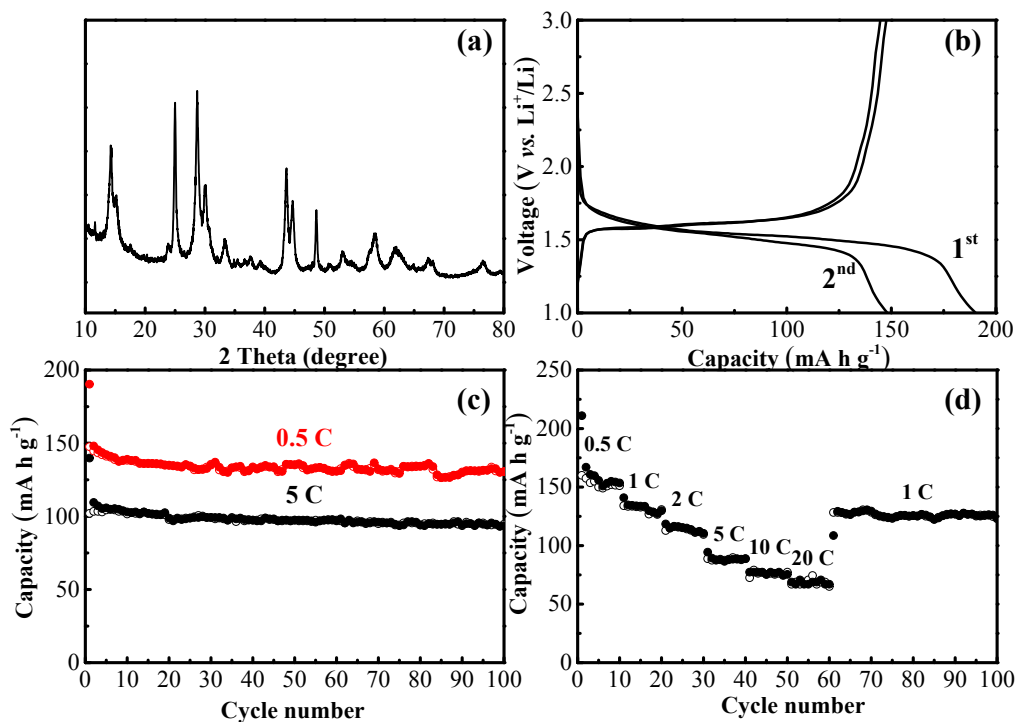

Fig. S4 (a) XRD pattern, (b) discharge-charge profiles, (c) cycling performances and (d) rate capability of bulk  $\text{TiO}_2\text{-B}$ .

Bulk  $\text{TiO}_2\text{-B}$  was obtained as the following: 1.0 g of anatase  $\text{TiO}_2$  was mixed with 0.65 g  $\text{KNO}_3$ . This powder was transferred to a ceramic boat and heated to  $1000\text{ }^\circ\text{C}$  in air for 6 h to form  $\text{K}_2\text{Ti}_4\text{O}_9$ . Excess 0.1 M  $\text{HNO}_3$  was added to the solid and stirred vigorously for 3 days. The solid was harvested via centrifugation, washed thoroughly with deionized water for several times, and then dried in an oven at  $70\text{ }^\circ\text{C}$  overnight. The resulting sample was calcined at  $500\text{ }^\circ\text{C}$  in air for 2 h with a heating rate of  $2\text{ }^\circ\text{C min}^{-1}$  and bulk  $\text{TiO}_2\text{-B}$  was obtained.

As shown in Fig. S4a, all the diffraction peaks of bulk  $\text{TiO}_2\text{-B}$  can be indexed to pure  $\text{TiO}_2\text{-B}$ . Fig. S4b shows discharge-charge profiles of bulk  $\text{TiO}_2\text{-B}$  at a current density of 0.5 C. As shown in Fig. S4b, bulk  $\text{TiO}_2\text{-B}$  showed a capacity of  $130.6\text{ mA h g}^{-1}$  after 100 cycles at a current density of 0.5 C, which was much lower than that of HMTOB. When the current density was increased to 5 C, a capacity of  $93.6\text{ mA h g}^{-1}$  was observed after 100 cycles. On the other hand, bulk  $\text{TiO}_2\text{-B}$  exhibited inferior rate capability. Capacities of 153.5, 129.8, 110.5, 88.8, 75.4 and  $67.0\text{ mA h g}^{-1}$  were observed at current densities of 0.5, 1, 2, 5, 10 and 20 C, respectively.

Table 1 Summary of hydrothermal or solvothermal time and rate capability for various TiO<sub>2</sub>-B as an anode for LIBs.

| TiO <sub>2</sub> -B                              | Hydrothermal or solvothermal time (hour) | Discharge capacity (mA h g <sup>-1</sup> ) | Rate  | Reference |
|--------------------------------------------------|------------------------------------------|--------------------------------------------|-------|-----------|
| Mesoporous TiO <sub>2</sub> -B microspheres      | 72                                       | 165                                        | 10 C  | 1         |
|                                                  |                                          | 130                                        | 30 C  |           |
| TiO <sub>2</sub> -B nanowires                    | 24                                       | 168                                        | ~ 3 C | 2         |
|                                                  |                                          | 140                                        | ~ 6 C |           |
| Nanosheet-constructed porous TiO <sub>2</sub> -B | 24                                       | 202                                        | 10 C  | 3         |
| Mesoporous TiO <sub>2</sub> -B microflowers      | 5                                        | 205                                        | 10 C  | 4         |
| TiO <sub>2</sub> -B nanosheets                   | 4                                        | 196                                        | 10 C  | 5         |
| TiO <sub>2</sub> -B hierarchical tubes           | 24                                       | 160                                        | 10 C  | 6         |
|                                                  |                                          | 130                                        | 20 C  |           |
| TiO <sub>2</sub> -B nanoparticles                | 22                                       | 128                                        | 5 C   | 7         |
|                                                  |                                          | 100                                        | 10 C  |           |
| hierarchically mesoporous TiO <sub>2</sub> -B    | 2                                        | 181.3                                      | 10 C  | This work |
|                                                  |                                          | 174.6                                      | 20 C  |           |

## References

- 1 H. S. Liu, Z. H. Bi, X. G. Sun, R. R. Unocic, M. P. Paranthaman, S. Dai and G. M. Brown, *Adv. Mater.*, 2011, **23**, 3450.
- 2 J. M. Li, W. Wan, H. H. Zhou, J. J. Li and D. S. Xu, *Chem. Commun.*, 2011, **47**, 3439-3441.
- 3 S. H. Liu, H. P. Jia, L. Han, J. L. Wang, P. F. Gao, D. D. Xu, J. Yang and S. N. Che, *Adv. Mater.*, 2012, **24**, 3201-3204.
- 4 V. Etacheri, Y. T. Kuo, A. Van der Ven and B. M. Bartlett, *J. Mater. Chem. A*, 2013, **1**, 12028-12032.
- 5 H. Huang, Z. Y. Yu, W. J. Zhu, Y. P. Gan, Y. Xia, X. Y. Tao and W. K. Zhang, *J. Phys. Chem. Solids*, 2014, **75**, 619-623.
- 6 H. Hu, L. Yu, X. H. Gao, Z. Lin and X. W. Lou, *Energ. Environ. Sci.*, 2015, **8**, 1480-1483.
- 7 C. Wessel, L. A. Zhao, S. Urban, R. Ostermann, I. Djerdj, B. M. Smarsly, L. Q. Chen, Y. S. Hu and S. Sallard, *Chem. Eur. J.*, 2011, **17**, 775-779.
